# Supplementary material for: Fertile Crescent crop progenitors gained a competitive advantage from large seedlings
Source: PubMed Central journal article supplement (PMC8019021; doi:10.1002/ece3.7282), 2021-03-04

1 **Supplementary Online Information for Fertile Crescent crop progenitors gained a competitive advantage from large seedlings**

2  
3 Catherine Preece, Glynis Jones, Mark Rees, Colin P. Osborne

4  
5 **Table S1. List of grass accessions used, including domestication status, accession number on the GRIN database, country of origin and mean initial seed mass in mg**  
6 **( $\pm 1SE$ ).**  
7

| Species                           | Status | Accession numbers | Country of origin | Mean seed mass mg ( $\pm 1SE$ ) | Used in growth experiment | Used in competition experiment |
|-----------------------------------|--------|-------------------|-------------------|---------------------------------|---------------------------|--------------------------------|
| <i>Aegilops speltoides</i> Tausch | Wild   | PI 170204         | Turkey            | 6.8 $\pm$ 0.27                  | Yes                       | Yes                            |
|                                   |        | PI 487231         | Syria             | 6.3 $\pm$ 0.57                  | Yes                       | Yes                            |
| <i>Aegilops tauschii</i> Coss.    | Wild   | PI 486275         | Turkey            | 8.7 $\pm$ 0.37                  | Yes                       | No                             |
|                                   |        | PI 511370         | Iran              | 16.1 $\pm$ 1.08                 | Yes                       | No                             |
| <i>Avena fatua</i> L.             | Wild   | PI 173584         | Turkey            | 10.9 $\pm$ 0.60                 | Yes                       | No                             |
|                                   |        | PI 432457         | USA               | 10.5 $\pm$ 0.87                 | Yes                       | No                             |
| <i>Avena sterilis</i> L.          | Wild   | PI 309527         | Israel            | 11.5 $\pm$ 0.72                 | Yes                       | No                             |
|                                   |        | PI 220372         | Afghanistan       | 16.1 $\pm$ 0.72                 | Yes                       | No                             |
|                                   |        | PI 134251         | Afghanistan       | 22.3 $\pm$ 1.09                 | No                        | Yes                            |
|                                   |        | PI 309424         | Israel            | 13.6 $\pm$ 1.31                 | No                        | Yes                            |

---

|                                                                           |                         |           |             |             |     |     |
|---------------------------------------------------------------------------|-------------------------|-----------|-------------|-------------|-----|-----|
|                                                                           |                         | PI 326955 | Israel      | 11.2 ± 0.59 | No  | Yes |
| <i>Bromus brachystachys</i><br>Hornung                                    | Wild                    | PI 220582 | Afghanistan | 2.4 ± 0.03  | Yes | Yes |
| <i>Eremopyrum bonaepartis</i><br>(Spreng.) Nevski                         | Wild                    | PI 227345 | Iran        | 3.1 ± 0.10  | Yes | Yes |
|                                                                           |                         | PI 227343 | Iran        | 1.8 ± 0.07  | Yes | Yes |
| <i>Eremopyrum orientale</i> (L.)<br>Jaub. & Spach                         | Wild                    | PI 229425 | Iran        | 3.1 ± 0.08  | Yes | No  |
|                                                                           |                         | PI 219963 | Iran        | 2.8 ± 0.06  | Yes | No  |
| <i>Hordeum marinum</i> subsp.<br><i>gussoneanum</i> (Parl.) Thell.        | Wild                    | PI 401358 | Iran        | 2.9 ± 0.21  | Yes | No  |
| <i>Hordeum vulgare</i> L. subsp.<br><i>spontaneum</i> (K. Koch)<br>Thell. | Progenitor              | PI 282656 | Israel      | 12.9 ± 0.79 | Yes | Yes |
|                                                                           |                         | PI 466126 | Syria       | 28.8 ± 0.88 | Yes | Yes |
| <i>Phalaris paradoxa</i> L.                                               | Wild                    | PI 202684 | Turkey      | 2.2 ± 0.29  | Yes | No  |
|                                                                           |                         | PI 380964 | Iran        | 1.8 ± 0.04  | Yes | No  |
| <i>Secale strictum</i> (C. Presl)<br>C. Presl                             | Wild                    | PI 383756 | Turkey      | 5.5 ± 0.22  | Yes | No  |
| <i>Secale vavilovii</i> Grossh.                                           | Secondary<br>progenitor | PI 284842 | Hungary     | 28.8 ± 0.71 | Yes | Yes |
|                                                                           |                         | PI 573649 | Afghanistan | 21.7 ± 0.63 | Yes | Yes |
| <i>Taeniatherum caput-<br/>medusae</i> (L.) Nevski                        | Wild                    | PI 577710 | Turkey      | 7.8 ± 1.90  | Yes | Yes |
|                                                                           |                         | PI 577709 | Turkey      | 4.1 ± 0.11  | No  | Yes |

---

---

|                                                                                               |            |           |         |             |     |     |
|-----------------------------------------------------------------------------------------------|------------|-----------|---------|-------------|-----|-----|
| <i>Triticum monococcum</i> L.<br>subsp. <i>aegilopoides</i> (Link)<br>Thell.                  | Progenitor | PI 352503 | Iran    | 14.2 ± 0.66 | Yes | No  |
|                                                                                               |            | PI 527697 | Canada  | 12.4 ± 0.99 | Yes | No  |
|                                                                                               |            | PI 245726 | Turkey  | 16.1 ± 2.25 | No  | Yes |
|                                                                                               |            | PI 427452 | Turkey  | 14.5 ± 1.39 | No  | Yes |
| <i>Triticum turgidum</i> L. subsp.<br><i>dicoccoides</i> (Körn. ex Asch.<br>& Graebn.) Thell. | Progenitor | PI 352324 | Lebanon | 32.1 ± 1.29 | Yes | No  |
|                                                                                               |            | PI 428022 | Turkey  | 23.2 ± 0.98 | No  | Yes |
|                                                                                               |            | PI 300989 | Israel  | 27.3 ± 1.04 | No  | Yes |

---

10 **Table S2. Species used in experiments 1 and 2 of the growth experiment.**

| Species                                                                                 | Experiment 1 | Experiment 2 |
|-----------------------------------------------------------------------------------------|--------------|--------------|
| <i>Aegilops speltoides</i> Tausch                                                       | X            | X            |
| <i>Aegilops tauschii</i> Coss.                                                          | X            | X            |
| <i>Avena fatua</i> L.                                                                   | X            | X            |
| <i>Avena sterilis</i> L.                                                                | X            | X            |
| <i>Bromus brachystachys</i> Hornung                                                     | X            | X            |
| <i>Eremopyrum bonaepartis</i> (Spreng.) Nevski                                          | X            | X            |
| <i>Eremopyrum orientale</i> (L.) Jaub. & Spach                                          | X            | X            |
| <i>Hordeum marinum</i> subsp. <i>gussoneanum</i> (Parl.) Thell.                         | X            |              |
| <i>Hordeum vulgare</i> L. subsp. <i>spontaneum</i> K. Koch) Thell.                      |              | X            |
| <i>Phalaris paradoxa</i> L.                                                             | X            | X            |
| <i>Secale strictum</i> (C. Presl) C. Presl                                              | X            |              |
| <i>Secale vavilovii</i> Grossh.                                                         | X            | X            |
| <i>Taeniatherum caput-medusae</i> (L.) Nevski                                           | X            |              |
| <i>Triticum monococcum</i> L. subsp. <i>aegilopoides</i> (Link)                         | X            | X            |
| <i>Triticum turgidum</i> L. subsp. <i>dicoccoides</i> (Körn. ex Asch. & Graebn.) Thell. | X            |              |

11

12

13

14

15

16

17 **Table S3. Species used in the competition experiment showing the nine species grown as monocultures and the**  
 18 **eight combinations of wild-progenitor pairs.**

| Monocultures                                                               | Mixtures                                 |     |                                                                    |
|----------------------------------------------------------------------------|------------------------------------------|-----|--------------------------------------------------------------------|
| <i>Aegilops speltoides</i> (wild)                                          | <i>Aegilops speltoides</i> (wild)        | and | <i>Hordeum vulgare</i> subsp. <i>spontaneum</i> (progenitor)       |
| <i>Avena sterilis</i> (secondary progenitor)                               | <i>Bromus brachystachys</i> (wild)       | and | <i>Hordeum vulgare</i> subsp. <i>spontaneum</i> (progenitor)       |
| <i>Bromus brachystachys</i> (wild)                                         | <i>Eremopyrum orientale</i> (wild)       | and | <i>Hordeum vulgare</i> L. subsp. <i>spontaneum</i> (progenitor)    |
| <i>Eremopyrum orientale</i> (wild)                                         | <i>Taeniatherum caput-medusae</i> (wild) | and | <i>Hordeum vulgare</i> subsp. <i>spontaneum</i> (progenitor)       |
| <i>Hordeum vulgare</i> subsp. <i>spontaneum</i> (primary progenitor)       | <i>Aegilops speltoides</i> (wild)        | and | <i>Triticum monococcum</i> subsp. <i>aegilopoides</i> (progenitor) |
| <i>Secale vavilovii</i> (secondary progenitor)                             | <i>Bromus brachystachys</i> (wild)       | and | <i>Triticum monococcum</i> subsp. <i>aegilopoides</i> (progenitor) |
| <i>Taeniatherum caput-medusae</i> (wild)                                   | <i>Eremopyrum orientale</i> (wild)       | and | <i>Triticum monococcum</i> subsp. <i>aegilopoides</i> (progenitor) |
| <i>Triticum monococcum</i> subsp. <i>aegilopoides</i> (primary progenitor) | <i>Taeniatherum caput-medusae</i> (wild) | and | <i>Triticum monococcum</i> subsp. <i>aegilopoides</i> (progenitor) |
| <i>Triticum turgidum</i> subsp. <i>dicoccoides</i> (primary progenitor)    |                                          |     |                                                                    |

**Fig. S1.** Mean natural logged plant biomass of species in the competition experiment (data for monocultures and mixtures pooled together where relevant).

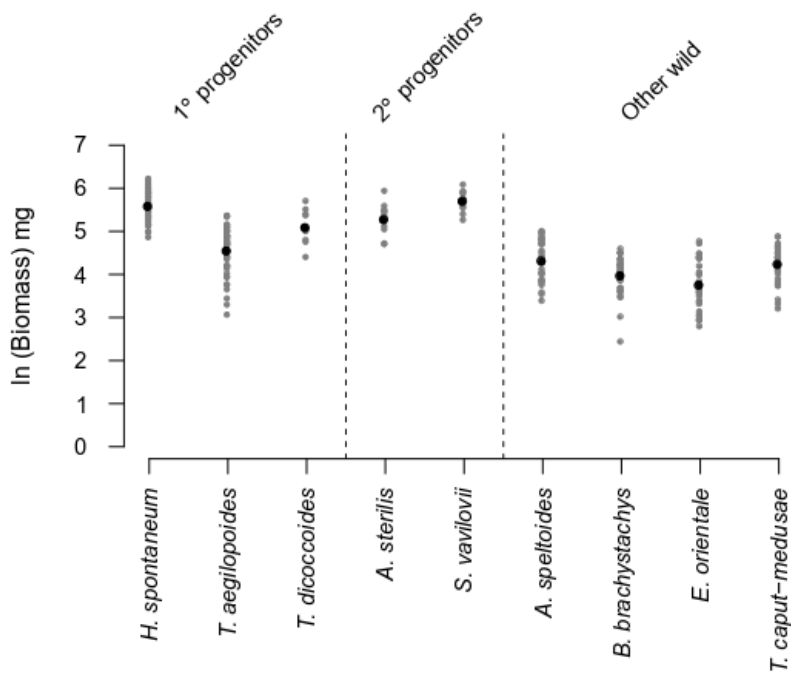

**Fig. S2.** The relationship between natural logged plant biomass and natural logged individual seed mass ( $P < 0.01$ ). Colours of points show the combinations of domestication status (prog = progenitor) and stand type (mix = mixture, and mono = monoculture).

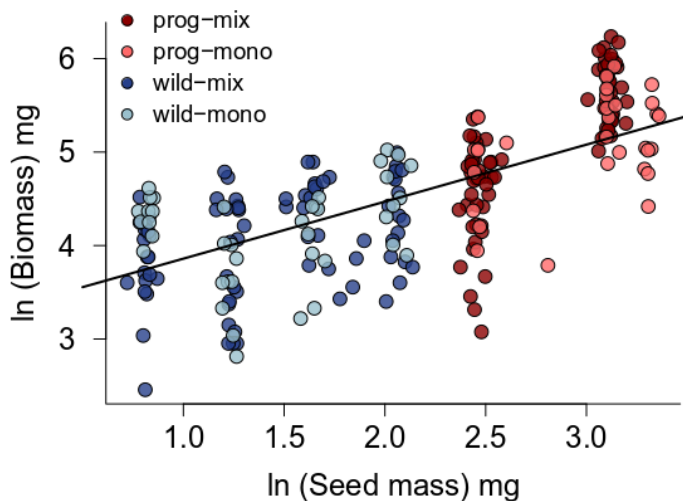

Supplement: ECE3-11-3300-s001.pdf [file ECE3-11-3300-s001.pdf]
